# Supplementary figures and images for: Translational initiation regulated by ATM in dendritic cells development
Source: PubMed Central journal article supplement — Cell Death Dis. 2014 Sep 11;5(9):e1418–. doi: 10.1038/cddis.2014.362 (PMC4540194; doi:10.1038/cddis.2014.362), 2014-09-11

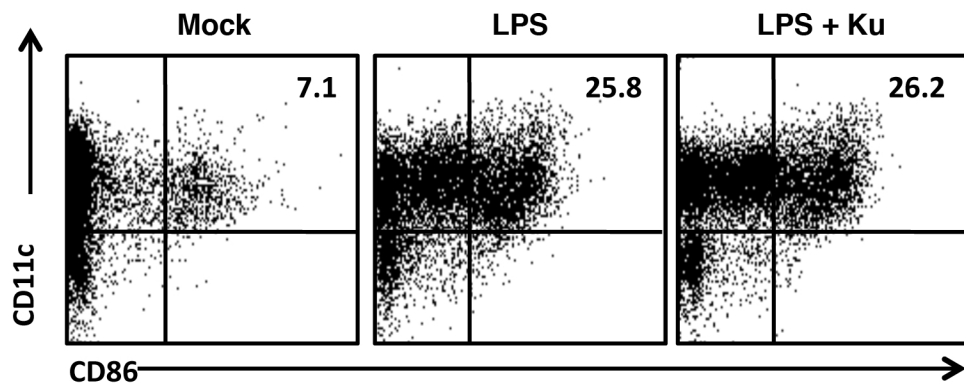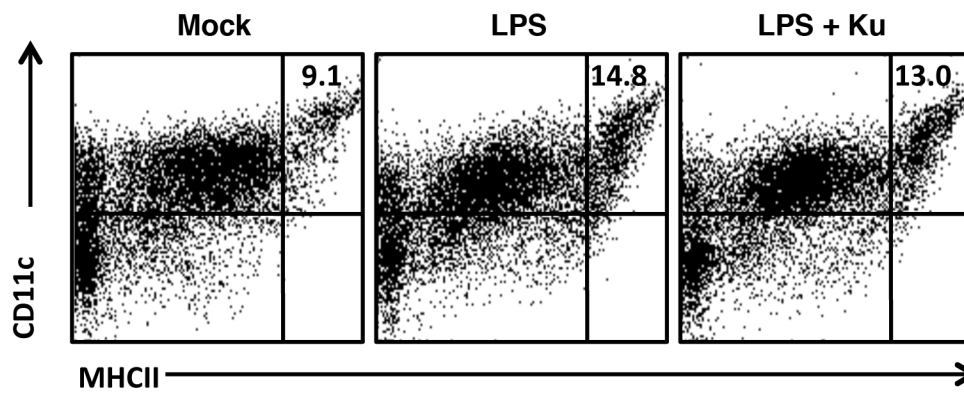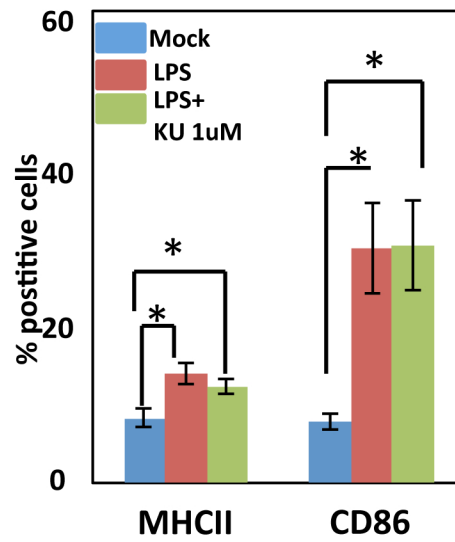

Supplement Figure S2

Supplement: cddis2014362x2.pdf [file cddis2014362x2.pdf]
